# Supplementary material
Source: MDPI journal article supplement (https://www.mdpi.com/2410-3888/7/1/22)
Supplement: s1 [file s1]

Table S1: Primers used in this study.

|                           | NCBI accession code | Gene symbol (Alias name) | Protein                                                        | Sense, antisense primer (5' → 3')                       |
|---------------------------|---------------------|--------------------------|----------------------------------------------------------------|---------------------------------------------------------|
| Immune receptor signaling | XM_021626126        | <i>NOD1a</i>             | Nucleotide-binding oligomerization domain-containing protein 1 | GACCGTGGTGAGATTGTGTG,<br>AGTTCACCAGTATGGGTGGC           |
|                           | NM_001124403        | <i>C3AR1</i>             | Complement 3a receptor 1                                       | GGCTTATACTCGGCTTCCTCAT,<br>TTCTTTGTGTGTTGGCTGCCTTA      |
|                           | XM_021609985        | <i>USP4</i>              | Ubiquitin specific peptidase 4                                 | GACGAGTGGTTTCTGATTGATAG,<br>CTATCCCGGCCCTGTTGACAA       |
|                           | XM_021601625        | <i>MAP3K1</i>            | Mitogen-activated protein kinase kinase 1                      | TCCTGGGAACCATTCCTTCAT,<br>CACCTCGCTCTCATATTCAAGAT       |
| Cytokine network          | NM_001124347        | <i>IL1B</i>              | Interleukin-1 beta                                             | GAGAGTGCTGTGGAAGAACATAT,<br>ATGAATGAGGCTATGGAGCTGC      |
|                           | NM_001124374        | <i>TNF</i>               | Tumour necrosis factor                                         | AGCATGGAAGACTGGCAACGAT,<br>CTTACCGCTGACACAGTGCAG        |
|                           | XM_036943661        | <i>LOC100135979</i>      | CC chemokine with stalk CK2                                    | TCCATGTTCCAGTCCAGGACC,<br>CTGCAAGGATACCGCATCCAAA        |
|                           | NM_001124489        | <i>CCL4a</i>             | C-C motif chemokine ligand 4 (variant a)                       | ATGGGTGAAGGACTACATCAACT,<br>TATTCACAAGGACATGGCCAGT      |
|                           | FN820501            | <i>IL4/13</i>            | Interleukin-4/-13                                              | AACACATTTGACTGCGACCACC,<br>AAACTTCAGAAGTGCACCGTTGT      |
|                           | NM_001124707        | <i>STAT1</i>             | Signal transducer and activator of transcription 1             | CCTGGCTGCTGCCAAAAGCA,<br>AACAAGTTTCAGGAAGCG-<br>GATCAGA |
|                           | NM_001146166        | <i>SOCS1</i>             | Suppressor of cytokine signaling 1                             | ACGGATTCTGCGTCGGAAAATAT,<br>ACGGATGCCAGGGAAGTGTGT       |
| Early immune effectors    | NM_001171901        | <i>MX1</i>               | MX dynamin like GTPase 1                                       | AGGAGGGAATAGACTACTTTTGAA,<br>ACATTACGAAGAGAAGGTGCGG     |
|                           | XM_021560785        | <i>LYGa</i>              | Lysozyme g (variant a)                                         | GCAGGTTGACAAGCGCTACCA,<br>AAAGGGGGAATTTTCAGCCTACAA      |
|                           | XM_021557048        | <i>LYGb</i>              | Lysozyme g (variant b)                                         | CAGGTTGATGTGGACCCAAATG,<br>CTTAAAGGGGGAATAGCTGCCT       |
|                           | XM_021615386        | <i>FGL2</i>              | Fibrinogen-like protein 2                                      | CAGCAACAAAATGGAGTCAGATAT,<br>CATGGAACTAAAGGCCCAAG       |
|                           | XM_021624437        | <i>FTH</i>               | Ferritin, heavy chain 1                                        | AACCGGATGATCAACTTGGAGAT,<br>GAGAGGTGGACGCATTTTACTC      |
|                           | XM_021586024        | <i>HP</i>                | Haptoglobin                                                    | CGACCCAGGCTTCCAGAACG,<br>ATCATCACAGGCTGGGGCTTG          |
| Host-protective effectors | XM_021590204        | <i>SOD1</i>              | Superoxide dismutase 1                                         | TGCTTATGGAGACAACACCAAC,<br>AATGTGGCTAAGATCAACATCCA      |
|                           | XR_002474449        | <i>SOD2</i>              | Superoxide dismutase 2                                         | TCCCTGACCTGACCTACGAC,<br>GAGGTTTAATGGAGGAGGCC           |
|                           | XM_021562188        | <i>SERPINB1</i>          | Serpin family B member 1 (leukocyte elastase inhibitor)        | TACCAGTTCGTTGAGACGTTCC,<br>ATCAAGAACCTATTGGCGGAGG       |
|                           | XM_021622415        | <i>UCP2</i>              | Uncoupling protein 2                                           | TTCGACCAGAGAGACGCCTTTA,<br>GTAATGGACACTTTTTTTGGGGG      |
| Heat-shock                | NM_001124231        | <i>HSP90AB1a</i>         | Heat-shock protein 90 alpha family class B member (variant a)  | ATGATCAAGCTGGGCCTGGGA,<br>CCTTATATAGCCTCACGTTTTCC       |

|                            |              |                                       |                                                                                         |                                                       |
|----------------------------|--------------|---------------------------------------|-----------------------------------------------------------------------------------------|-------------------------------------------------------|
| Leukocyte-specific markers | XM_021598372 | <i>HSP90AB1b</i>                      | Heat-shock protein 90 alpha family class B member (variant b)                           | GCTGGGTCTGGGAATCGATGA,<br>GTCTCAAACCTACACACCTGTAT     |
|                            | XM_021602849 | <i>HSP30</i>                          | Heat-shock protein 30                                                                   | AAGGGGTGAATCCTGAGACAGT,<br>TGAAAACCCCAACAATTCCTGTCA   |
|                            | XM_021618128 | <i>SERPINH1b</i><br>( <i>HSP47b</i> ) | Heat-shock protein 47 (variant b)                                                       | ACCGCACAGGTCTCTATGGTTT,<br>TTCAGCTTGCCCATCCAGTCAT     |
|                            | S63348       | <i>IGHM</i>                           | Immunoglobulin, heavy constant chain mu (B-cell marker)                                 | TACAAGAGGGAGACCGGAGGA,<br>CTTGTTGACGATGAGCCGGTG       |
|                            | EU072699     | <i>TRB</i>                            | T cell receptor beta (T-cell marker)                                                    | GTCTTCTGGCAAGTCAACAATGT,<br>TCACCTGCATTGTCAGCTTTTAC   |
|                            | XM_021617761 | <i>NCCRP1</i>                         | non-specific cytotoxic cell receptor protein 1 (marker for non-specific cytotoxic cell) | TACGAAGCGAAGCCGTTCCGGT,<br>GACTATACTGGCTGGACCACC      |
|                            | XM_021600095 | <i>ENPP3</i>                          | Ectonucleotide pyrophosphatase/phosphodiesterase 3 (marker for basophilic granulocytes) | CAGGCAACTCATCAAGGCTAATT,<br>GATATTCTCATGCCGTTATGGGT   |
|                            | XM_021582163 | <i>MPO</i>                            | Myeloperoxidase (marker for neutrophilic granulocyte)                                   | GTGAAGGACCAGATCATTGTATTA,<br>TAGTATTGCCTCTTTTAGGTGAGA |
|                            | XM_021581433 | <i>CSF3R</i><br>( <i>GCSFR</i> )      | Colony stimulating factor 3 receptor (granulocyte marker)                               | TACCACGGACCGGCTTTGTTC,<br>AAGGTCCAAGCAGAGCCAAACA      |
|                            | XM_021559488 | <i>CSF1R</i><br>( <i>MCSFR</i> )      | colony stimulating factor 1 receptor (macrophage marker)                                | AACGAATGCTGGTGGTGTGTTGAA,<br>CTTAGTTTGATGCTGGACGTAATA |
|                            | NM_001124578 | <i>TLR3</i>                           | Toll-like receptor 3 (marker for antigen-presenting cells)                              | AGTCCTCCACCTGTCGAATCTA ,<br>GAGCTTTCTGGGACAGCGATC     |
|                            | XM_021603069 | <i>ITGA2B</i><br>( <i>CD41</i> )      | Integrin subunit alpha 2b (thrombocyte marker)                                          | TATTATACAGTACGGGGTTGAGC,<br>ATTGAATTTGCTCGACAGAACGC   |
